# Supplementary material for: Design and synthesis of a chemosensor for the detection of Al3+ based on ESIPT
Source: Royal Society of Chemistry journal article supplement (doi:10.1039/c4ay01330a), 2014-01-01
Supplement: c4ay01330a1.pdf [file c4ay01330a1.pdf]

## Supporting information

### **Design and synthesize a chemosensor for the detection of Al<sup>3+</sup> based on ESIPT**

Jing-can Qin, Zheng-yin Yang\*, Long Fan, Xiao-ying Cheng, Tian-rong Li, Bao-dui Wang

College of Chemistry and Chemical Engineering, State Key Laboratory of Applied Organic Chemistry, Lanzhou University, Lanzhou 730000, P.R. China

\*\*Corresponding author. Tel.: +86 931 8913515; Fax: +86 931 8912582; e-mail:

[yangzy@lzu.edu.cn](mailto:yangzy@lzu.edu.cn)

(Z.Y.

Yang)

**Fig. S1** The  $^1\text{H}$  NMR of ethyl 2-methyl quinoline-4-carboxylate

**Fig. S2** The  $^1\text{H}$  NMR of 2-methyl quinoline-4-carboxylic acid hydrazide.

**Fig. S3** The  $^1\text{H}$  NMR of HL.

**Fig. S4** The ESI-MS spectra of HL.

**Fig. S5** The ESI-MS spectra of HL and  $\text{Al}^{3+}$ .

**Fig. S6**  $^1\text{H}$  NMR titration,  $\text{Al}^{3+}$  (1.0 equiv.) was added to the  $\text{DMSO-d}_6$  solution of HL.

**Fig. S7** The IR spectra of HL.

**Fig. S8** The IR spectra of HL and  $\text{Al}^{3+}$ .

**Fig. S1** The  $^1\text{H}$  NMR of ethyl 2-methyl quinoline-4-carboxylate

**Fig. S2** The  $^1\text{H}$  NMR of 2-methyl quinoline-4-carboxylic acid hydrazide.

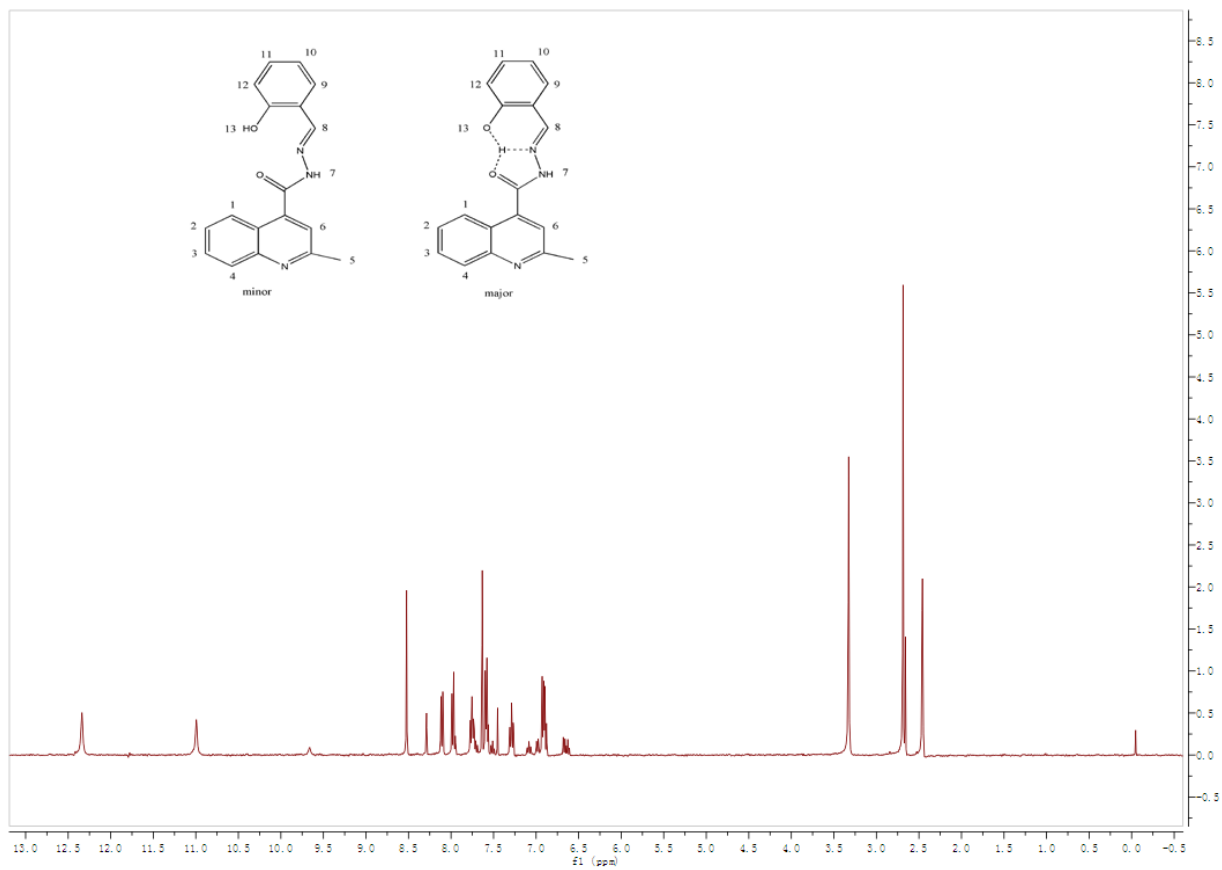

**Fig. S3** The  $^1\text{H}$  NMR of HL.

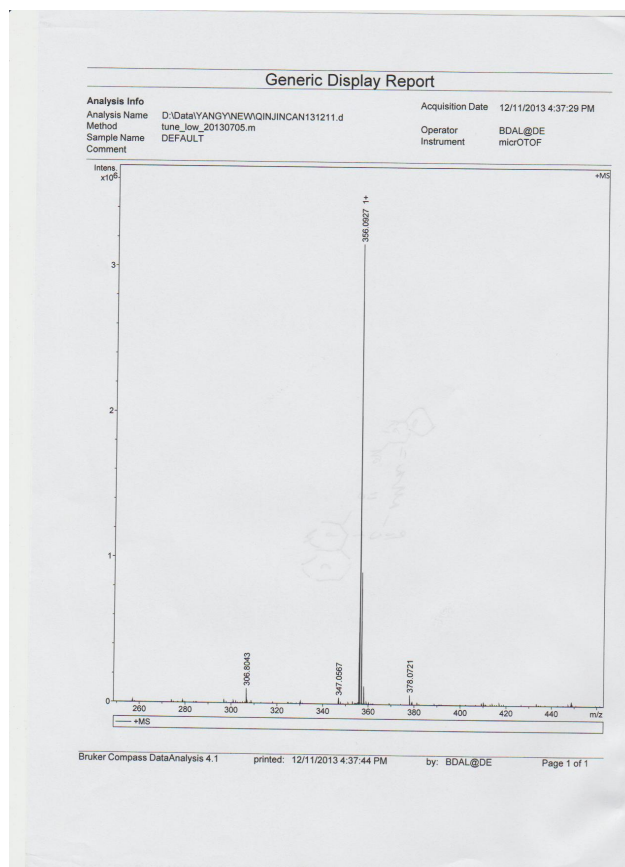

**Fig. S4** The ESI-MS spectra of HL.

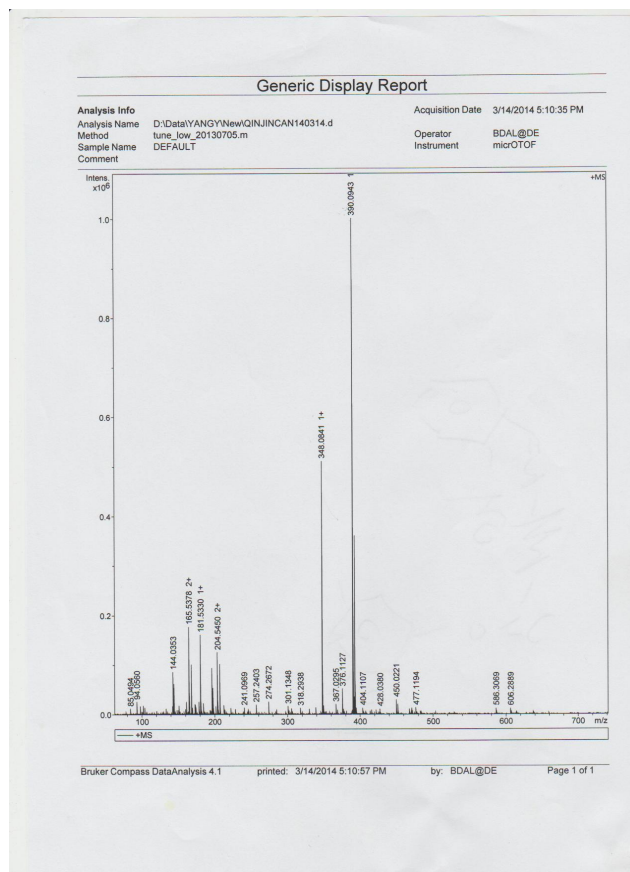

**Fig. S5** The ESI-MS spectra of HL and Al<sup>3+</sup>.

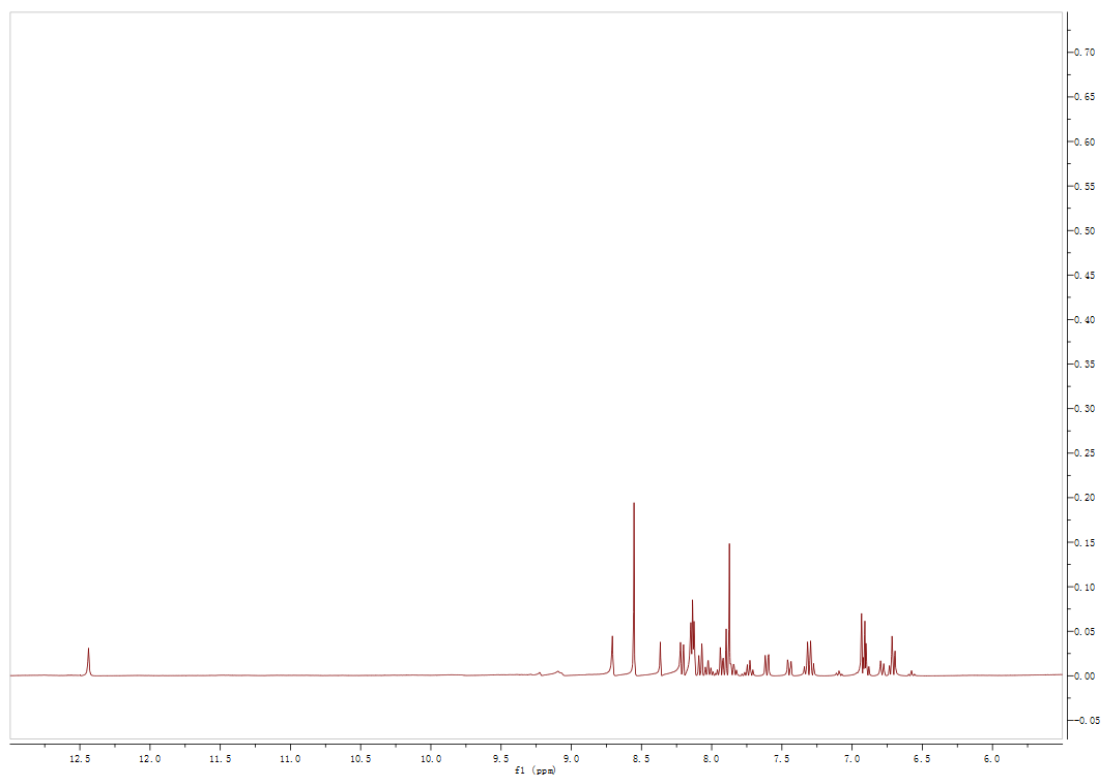

Fig. S6 <sup>1</sup>H NMR titration, Al<sup>3+</sup> (1.0 equiv.) was added to the DMSO-d<sub>6</sub> solution of HL.



**Fig. S7** The IR spectra of HL.

**Fig. S8** The IR spectra of HL and Al<sup>3+</sup>.
